# Supplementary material for: Comparative Genomic Analysis Reveals the Functional Traits and Safety Status of Lactic Acid Bacteria Retrieved from Artisanal Cheeses and Raw Sheep Milk
Source: MDPI journal article supplement (doi:10.3390/foods12030599), 2023-02-01
Supplement: s1 [file s1]

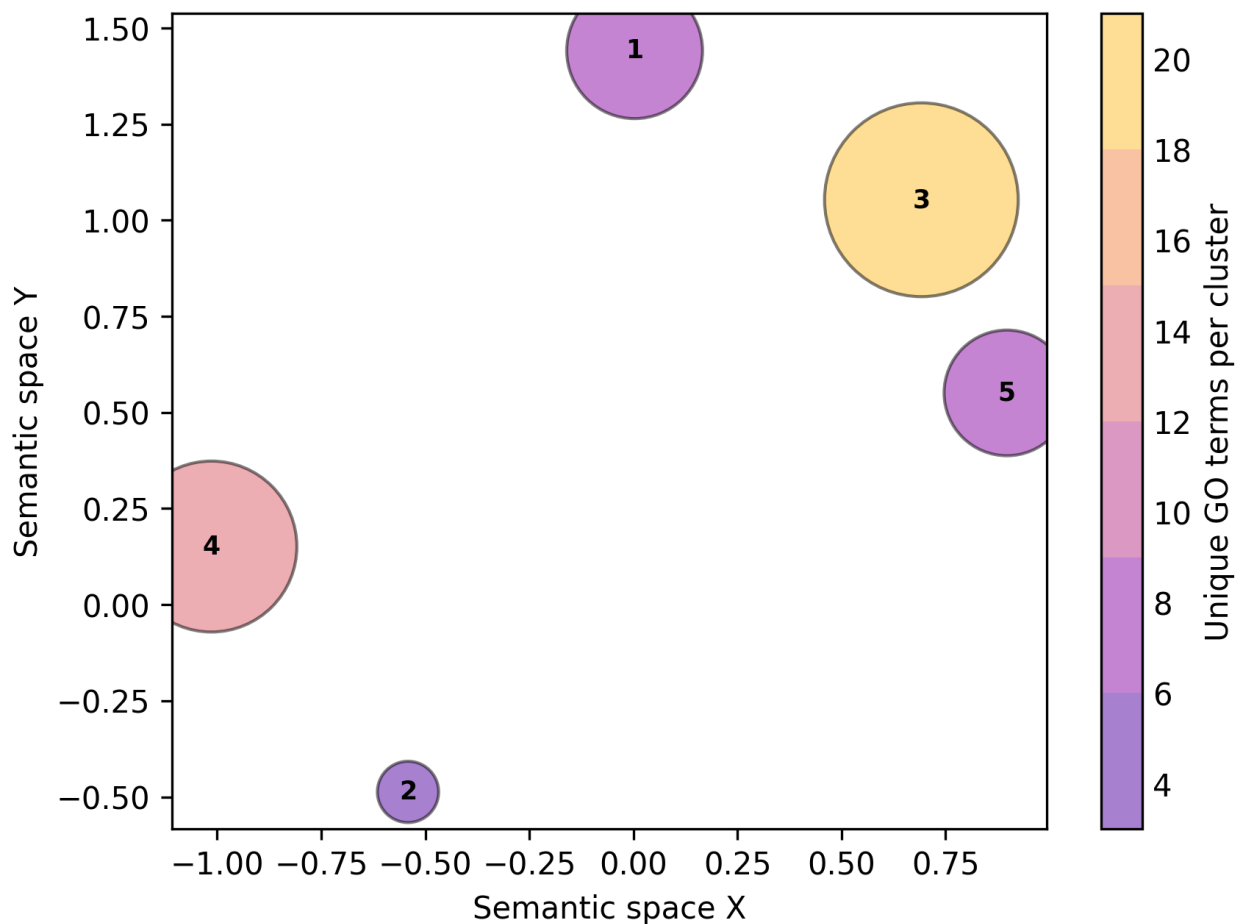

- 1. GO:0019359 nicotinamide nucleotide biosynthetic process
- 2. GO:0009294 DNA mediated transformation
- 3. GO:0006400 tRNA modification
- 4. GO:0030420 establishment of competence for transformation
- 5. GO:0002099 tRNA wobble guanine modification

Gene ontology (GO) biological processes significantly overrepresented in isolates able to metabolize **ribose**

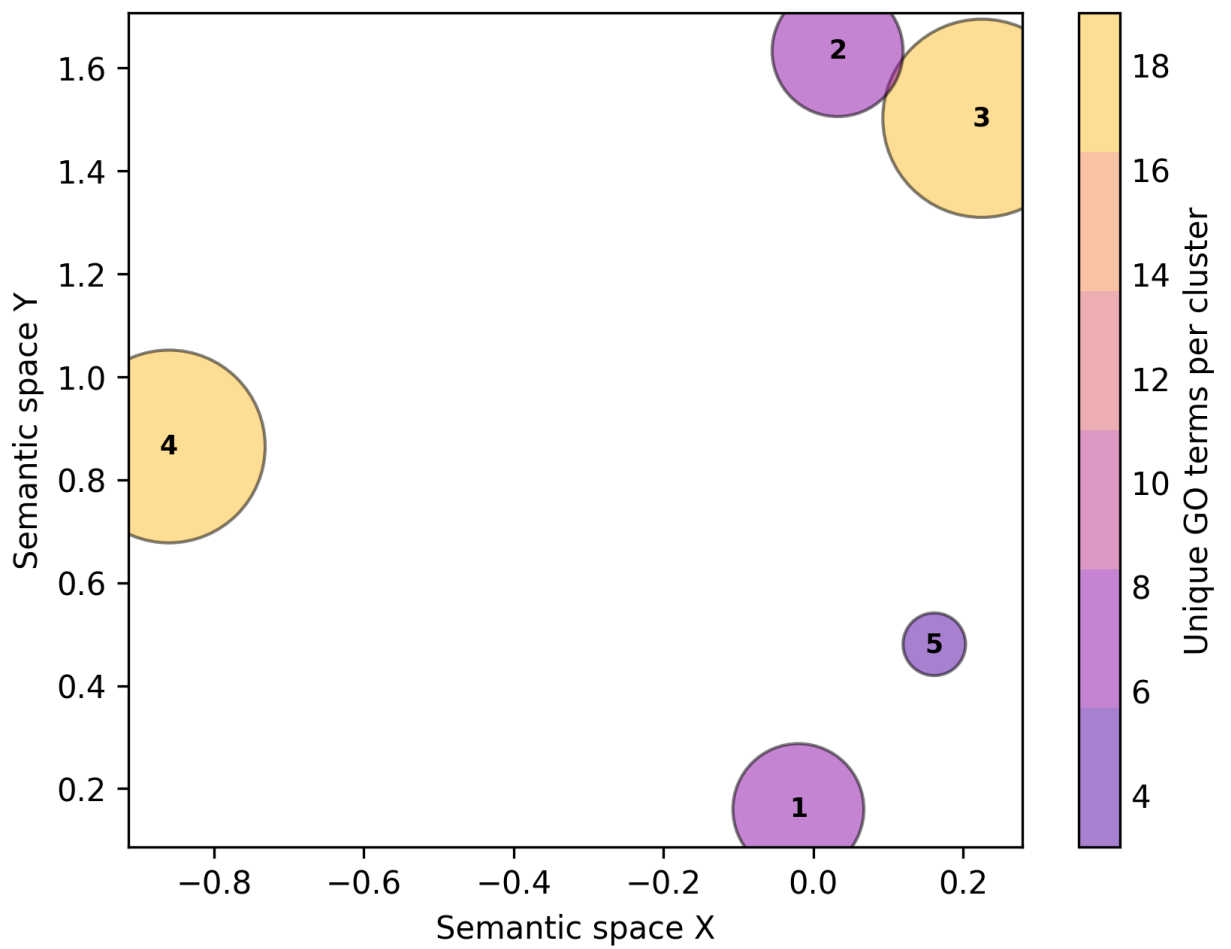

1. GO:0017144 drug metabolic process
2. GO:2000234 positive regulation of rRNA processing
3. GO:0090070 positive regulation of ribosome biogenesis
4. GO:0030420 establishment of competence for transformation
5. GO:0009294 DNA mediated transformation

Gene ontology (GO) biological processes significantly overrepresented in isolates able to metabolize **cellobiose**

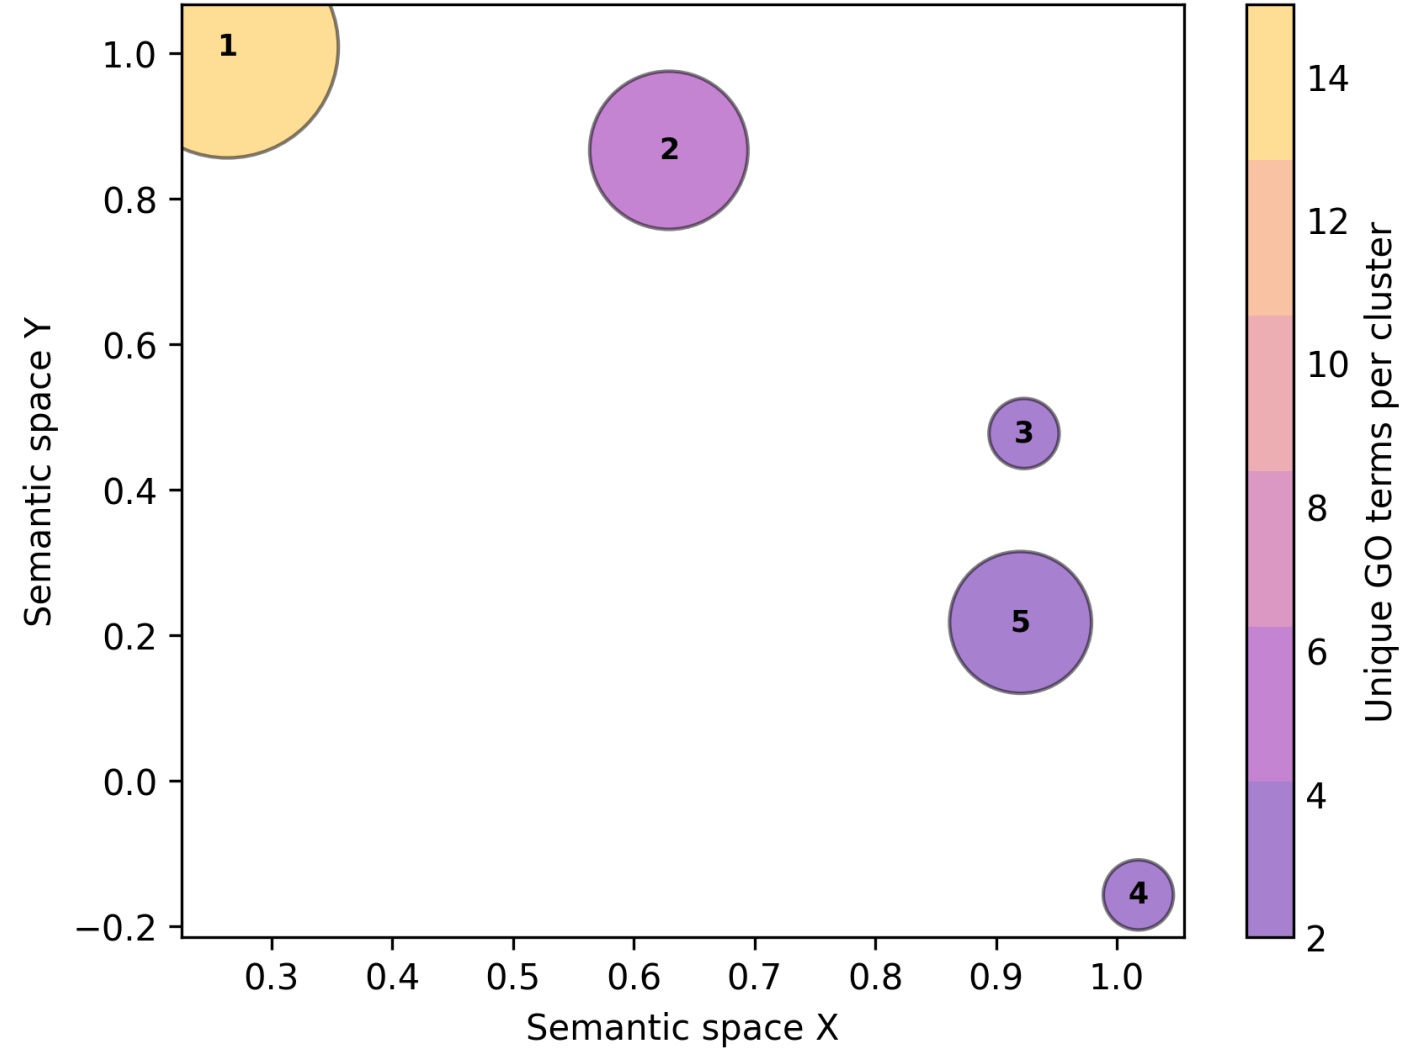

- |                                             |                                                         |
|---------------------------------------------|---------------------------------------------------------|
| 1. GO:0009245 lipid A biosynthetic process  | 4. GO:0006308 DNA catabolic process                     |
| 2. GO:0046040 IMP metabolic process         | 5. GO:0034414 tRNA 3'-trailer cleavage, endonucleolytic |
| 3. GO:0006431 methionyl-tRNA aminoacylation |                                                         |

Gene ontology (GO) biological processes significantly overrepresented in isolates able to metabolize **raffinose**

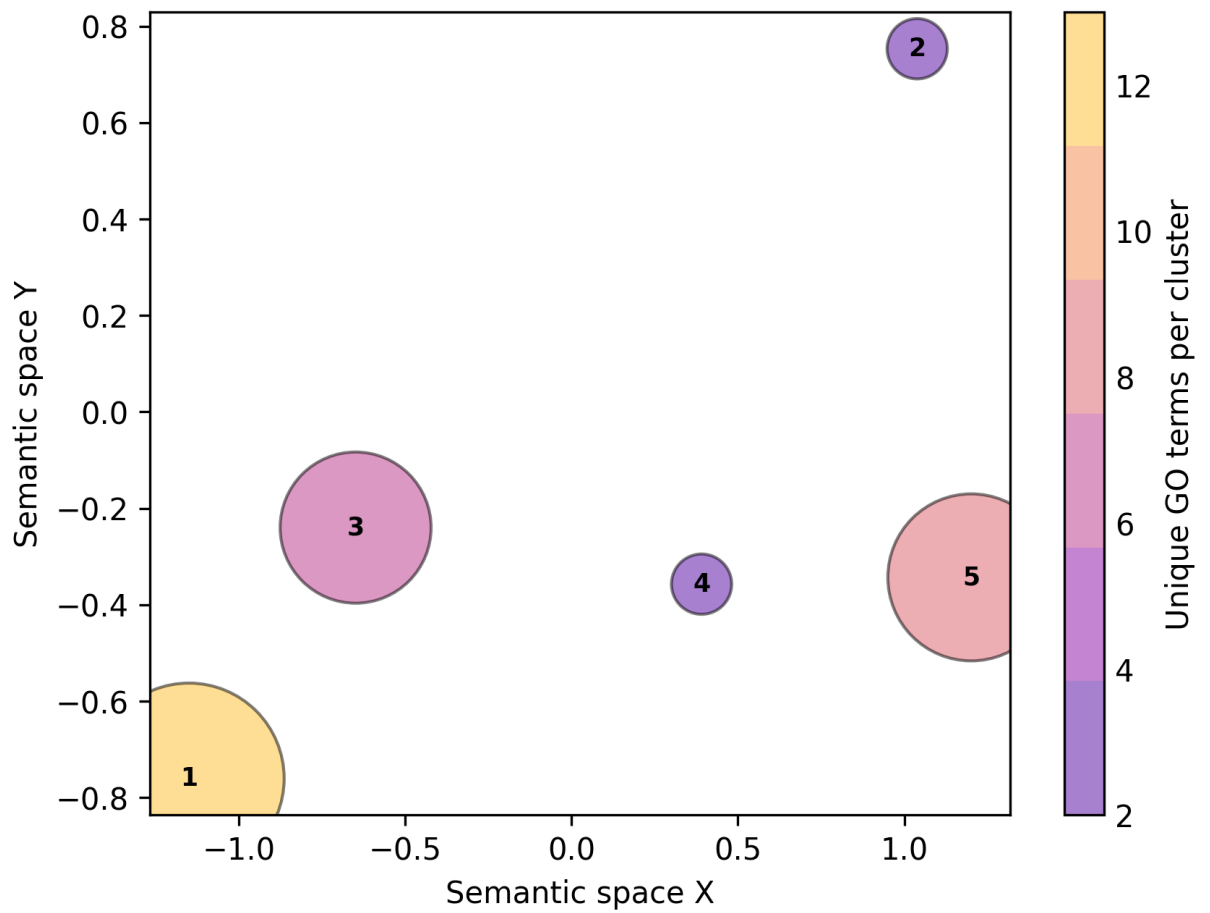

- 1. GO:0019569 L-arabinose catabolic process to xylulose 5-phosph...
- 2. GO:0046618 drug export
- 3. GO:0042840 D-glucuronate catabolic process
- 4. GO:0006413 translational initiation
- 5. GO:0006268 DNA unwinding involved in DNA replication

Gene ontology (GO) biological processes significantly overrepresented in isolates able to metabolize **arabinose**

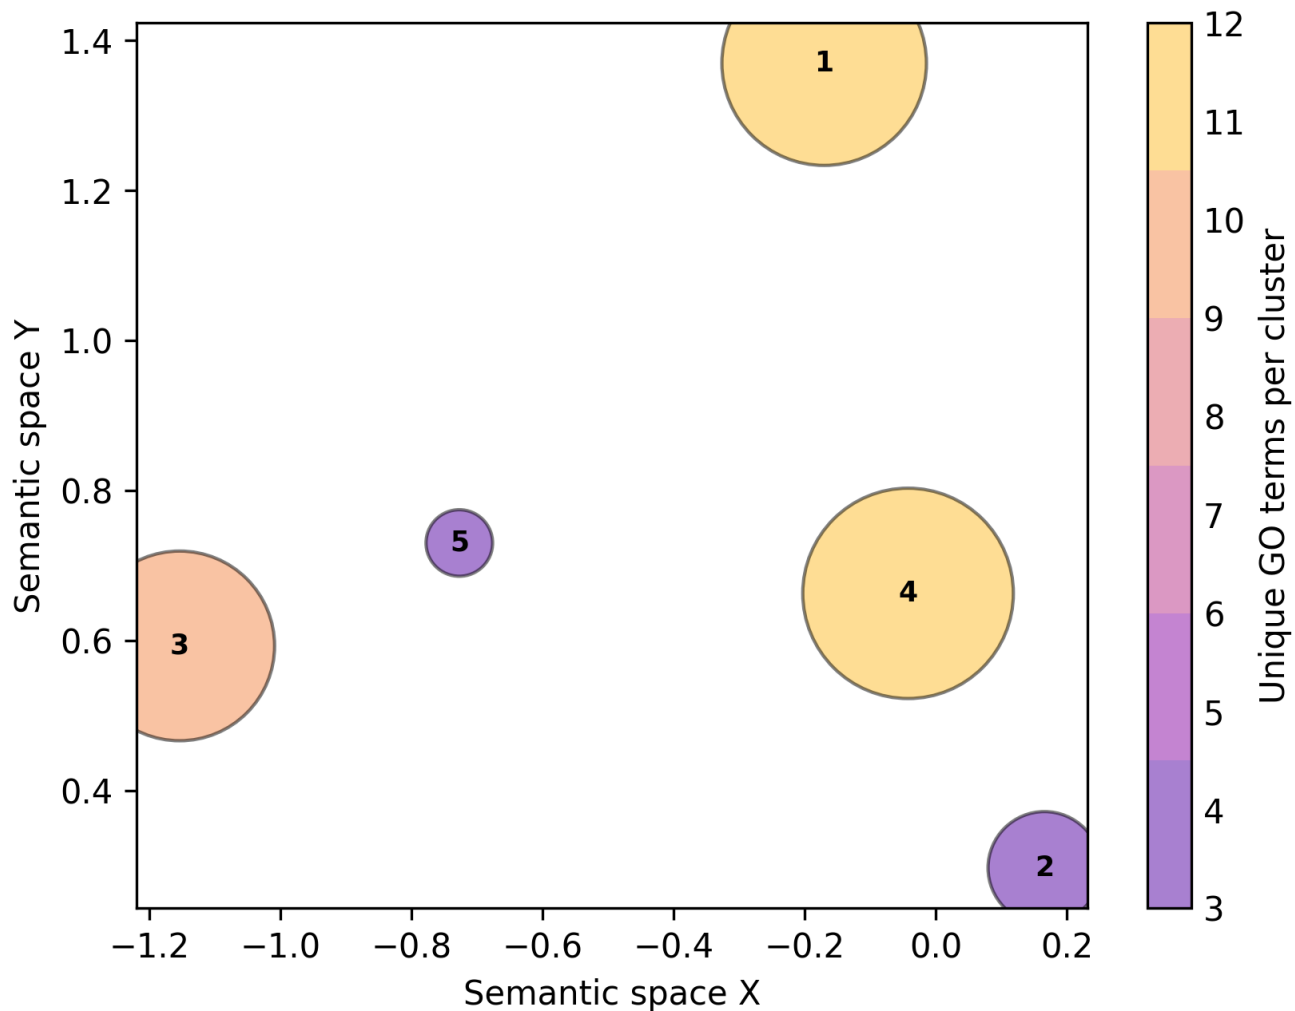

1. GO:0045226 extracellular polysaccharide biosynthetic process

2. GO:0006288 base-excision repair, DNA ligation

3. GO:0006047 UDP-N-acetylglucosamine metabolic process
4. GO:0006487 protein N-linked glycosylation

5. GO:0009101 glycoprotein biosynthetic process

Gene ontology (GO) biological processes significantly overrepresented in isolates able to metabolize **mannitol**
